# Supplementary material for: Combined spectroscopy methods and molecular simulations for the binding properties of trametinib to human serum albumin
Source: PubMed Central journal article supplement (PMC9077761; doi:10.1039/c7ra12890h), 2018-01-26
Supplement: RA-008-C7RA12890H-s001.pdf [file RA-008-C7RA12890H-s001.pdf]

## Electronic Supplementary Information (ESI)

Combined spectroscopy methods and molecular simulations on the  
binding properties of trametinib to human serum albumin

Zili Suo, Qiaomei Sun, Hongqin Yang, Peixiao Tang\*, Ruixue Gan, Xinnuo Xiong,  
and Hui Li\*

*College of Chemical Engineering Sichuan University, Chengdu 610065, PR China*

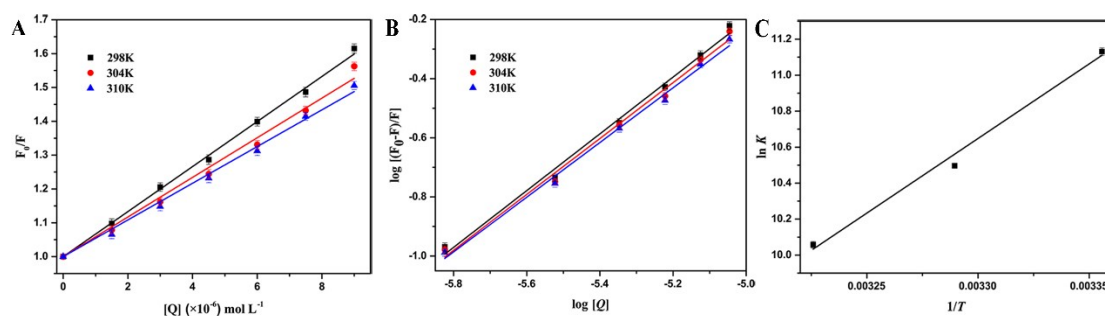

Fig. S1 Stern-Volmer plots (A), the Double-log plots (B) and the van't Hoff plot (C) for the trametinib-HSA interaction.

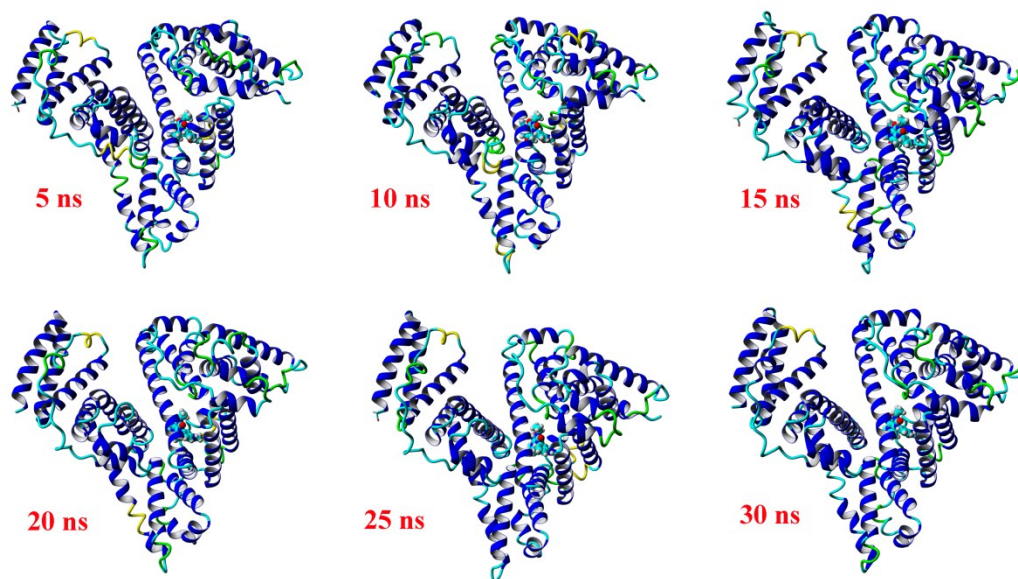

Fig. S2 Several sampled snapshots of trametinib–HSA complex in the MD simulation.

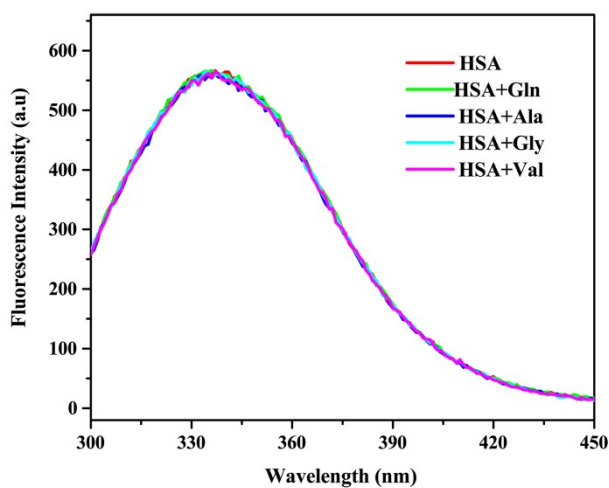

Fig. S3 Fluorescence emission spectra of HSA (2.0  $\mu\text{M}$ ) with Gln, Ala, Gly, and Val (400.0  $\mu\text{M}$ ).

Table S1 Content of  $\alpha$ -helical of HSA under different concentrations of trametinib.

| System         | $C_{\text{Trametinib}}$<br>( $\mu\text{M}$ ) | $\alpha$ -helical (%) |
|----------------|----------------------------------------------|-----------------------|
| Trametinib–HSA | 0.0                                          | 53.25                 |
|                | 4.0                                          | 52.43                 |
|                | 8.0                                          | 52.89                 |
